# Supplementary material
Source: PubMed Central journal article supplement (PMC3619317)
Supplement: 1222807110_pnas.201222807SI.pdf [file 1222807110_pnas.201222807SI.pdf]

# Supporting Information

Chen et al. 10.1073/pnas.1222807110

## SI Methods

**1. Denaturing, Native, and Biotin Purification of Chemically Synthesized DNA Hairpins.** Chemically synthesized hairpins were purified in-house with 8% (wt/vol) PAGE with 7 M Urea. To perform native (N) purification, 1 nmol  $M_i$  and 1 nmol of  $A_i$ , each in  $\sim 30 \mu\text{L}$   $1\times$  TNaK buffer [20 mM Tris (pH 7.5) at 25 °C, 140 mM NaCl, 5 mM KCl], were separately refolded. The two hairpins were then mixed and incubated at room temperature overnight. The mixture was then resolved with 8% native PAGE. The gel was stained with SYBR Gold and imaged using a STORM scanner (GE Healthcare). The bands corresponding to monomeric  $M_i$  and  $A_i$  were excised, crushed, and eluted with  $\sim 1 \text{ mL}$   $1\times$  TNaK at 37 °C overnight with shaking. The eluted DNA was then filtered through a 0.45- $\mu\text{m}$  NanoSep filter (Pall) to remove gel debris and concentrated using an AmiconUltra-0.5 (3K MWKO) concentrator (Millipore).

To perform biotin (B) purification of  $M_1$ , the “capture construct” (Fig. S3B) was prepared from 10  $\mu\text{M}$  of  $S_2\text{mimic-LBio}$  and 20  $\mu\text{M}$  of  $S_2\text{mimic-S}$ , using a procedure similar to that used to prepare the fluorescent reporters (SI Methods, section 3). Roughly 100  $\mu\text{L}$  of High-Capacity NeutrAvidin Agarose Resin (Pierce) was loaded on a 10-mL column (Bio-Rad) and washed with  $\sim 30 \text{ mL}$  of  $1\times$  TNaK. The resin was then removed from the column and incubated with 1 nmol of the capture construct (with  $M_2\text{mimic-S}$  in excess) in a 400- $\mu\text{L}$  slurry at 37 °C for 45 min. The charged resin was transferred to the same Bio-Rad column and washed with  $\sim 30 \text{ mL}$   $1\times$  TNaK, recollected into a 1.5-mL tube, and incubated with 250 pmol of DN-pure  $M_2$  at 37 °C overnight with gentle shaking. DNB-pure  $M_1$  was recovered by filtering through a 0.45- $\mu\text{m}$  NanoSep filter. The concentration of  $M_1$  was estimated by running an aliquot of DNB-pure  $M_1$  with a gradient of known quantity of D-pure  $M_1$  on an 8% denaturing polyacrylamide gel and comparing the intensity of SYBR gold staining.

**2. Enzymatic Synthesis of DNA Hairpins.** The plasmid containing the hairpin sequence and flanking sequences were constructed using a modified version of inside-out gene assembly (1) (with particular caution that oligonucleotides and intermediate assembly products should not self-prime) and sequence- and ligation-independent cloning (SLIC) (2). Oligonucleotides used to construct these sequences are listed in Table S2. The upstream flanking sequence contains an Nt.BstNBI recognition site 4 bp away from the hairpin sequence so that the nicking site is immediately upstream of the hairpin sequence. The last 3 bp of the hairpin sequence and the first 3 bp of the downstream flanking sequence constitute a PvuII site.

Roughly 750 ng of sequence-verified plasmid was used as the template of a 34.56-mL PCR carried out in three 96-well PCR plates, with each well containing a single 120- $\mu\text{L}$  reaction. The DNA polymerases used in these reactions were commercial Vent(exo<sup>-</sup>) (New England Biolabs) for  $eM_1$  and  $eM_2$  or laboratory-made DNA polymerase His6-Pfu-Sso7d (3) for  $eM_3$  and  $eA_3$ , with the PCR buffers being commercial  $1\times$  ThermoPol (New England Biolabs) or laboratory-made  $1\times$  Buffer S1.5 [200 mM Tris-H<sub>2</sub>SO<sub>4</sub> (pH 8.8) at 25 °C, 50 mM K<sub>2</sub>SO<sub>4</sub>, 100 mM (NH<sub>4</sub>)<sub>2</sub>SO<sub>4</sub>, 15 mM MgSO<sub>4</sub>, 1% Triton X-100, 1 mg/mL nuclease-free BSA], respectively. dNTP concentrations in both PCR reactions were 0.2 mM each.

The PCR products were mixed with 3 vol of Buffer QG (Qiagen) and column-purified using 24 EconoSpin columns (Epoch Life Science). The DNA in each column was eluted with

50  $\mu\text{L}$   $1\times$  TE (10 mM Tris-HCl, pH 7.5 at 25 °C, 1 mM EDTA). Typically  $\sim 500 \mu\text{g}$  of DNA was recovered.

The recovered DNA was digested with 3,000 units of PvuII-HF (New England Biolabs) in a 1.5-mL reaction in  $1\times$  NEBuffer 4 (New England Biolabs) at 37 °C for  $\sim 3 \text{ h}$ . The reaction was then quenched with the addition of 300  $\mu\text{L}$  of 100 mM EDTA. The quenched reaction was concentrated with an AmiconUltra-0.5 (3K MWKO) concentrator to  $\sim 60 \mu\text{L}$ , all of which was loaded on a 4% NuSieve GTG agarose gel (Lonza) containing 10  $\mu\text{g/mL}$  Ethidium Bromide (EtBr). The upper band was excised under blue light (to avoid UV damage). The gel slice was melted with 6 vol of Buffer QG at 50 °C for  $\sim 15 \text{ min}$  and purified with 20 EconoSpin columns. The DNA on each column was eluted with 50  $\mu\text{L}$   $1\times$  TE. Typically 250–300  $\mu\text{g}$  of DNA was recovered.

The recovered DNA was digested with 1,000 units of Nt.BstNBI (New England Biolabs) in a 2-mL reaction in  $1\times$  NEBuffer 3 (New England Biolabs) at 55 °C for  $\sim 3 \text{ h}$ , after which 6 mL of Buffer QG was added to the reaction and the DNA was column-purified using 12 EconoSpin columns. The DNA on each column was eluted with 50  $\mu\text{L}$   $1\times$  TE. Typically 180–200  $\mu\text{g}$  of DNA was recovered.

The recovered DNA was then treated with 300 units of Vent(exo<sup>-</sup>) (New England Biolabs) in a 1.5-mL reaction in the presence of  $1\times$  ThermoPol and 0.2 mM of each dNTP at 72 °C for 30 min. The reaction was then quenched, concentrated, and resolved in a 4% NuSieve GTG gel in the same procedure described above. The lower band, which contains the DNA hairpin, was excised. The gel slice was crushed via passing through an 18-gauge needle and eluted with  $\sim 10 \text{ mL}$   $1\times$  TNaK supplemented with 0.5 mM EDTA in a 50-mL conical tube at 37 °C on a rotator for 12–16 h. The slurry was then filtered through a piece of folded Kimwipe (Kimberly-Clark), and the filtrate was concentrated using an AmiconUltra-15 (3K MWCO) concentrator to  $\sim 400 \mu\text{L}$ . The EtBr in the DNA was extracted three times with equal volumes of water-saturated isoamyl alcohol. The aqueous phase was then subjected to ethanol precipitation. The pellet was resuspended with  $\sim 60 \mu\text{L}$   $1\times$  TNaK and heated at 60 °C for  $\sim 10 \text{ min}$  to melt residual agarose gel [which did not appear to affect catalyzed hairpin assembly (CHA) reactions]. DNA hairpin was quantified using a NanoDrop spectrophotometer. Typically 500–900 pmol of DNA hairpin was recovered.

**3. Kinetic Characterization of CHA Reactions and Cascades.** All reactions containing a fluorescent reporter were set up at 37 °C, in 40- $\mu\text{L}$  volume with the following buffer composition:  $1\times$  TNaK supplemented with 0.5 $\times$  TE [5 mM Tris (pH 7.5) at 25 °C, 0.5 mM EDTA] and 1  $\mu\text{M}$  oligonucleotide (dT)<sub>21</sub>. Two 18- $\mu\text{L}$  aliquots were drawn from this mixture and each was transferred to 1 well of a 384-well plate (shallow well, black, polypropylene; Nalge Nunc International) prewarmed at 37 °C. The plate was then immediately transferred to a TECAN Safire plate reader. All fluorescent reporters were prepared by annealing 10  $\mu\text{M}$  of the fluorophore strand with 20  $\mu\text{M}$  of the quencher strand in  $1\times$  TNaK. For each  $S_i$  at 150 nM concentration, the fluorescent signals in the absence and the presence of 100 nM  $C_i$  (which should completely displace the quencher-bearing strand of  $S_i$ ) were recorded and served as a calibration standard to calculate the concentration of  $M_i:A_i$  by linear interpolation. D-pure and enzymatically synthesized hairpins were stored at  $-20 \text{ }^\circ\text{C}$  and separately refolded immediately before use by heating to 90 °C for 1 min followed by slowly cooling down





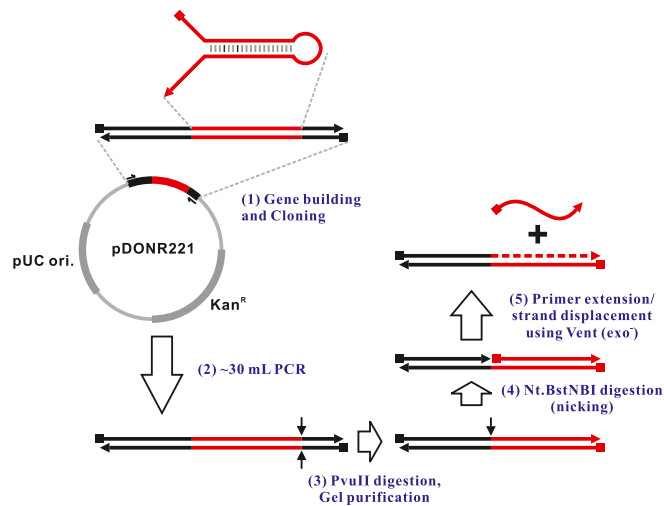

**Fig. S4.** Route of large-scale enzymatic hairpin synthesis. (1) The double-stranded DNA containing the hairpin sequence flanked by spacer sequences is built from oligonucleotides and cloned into a pDONR221-based vector. (2) The plasmid with confirmed sequence serves as the template of a large-scale (~30 mL) PCR. (3) The PCR product is then digested with PvuII to remove the downstream flanking sequence. (4) A nick in the sense strand between the upstream flanking sequence and the hairpin sequence is introduced by Nt.BstNBI. (5) The desired ssDNA is displaced by Vent(exo<sup>-</sup>) during primer extension.

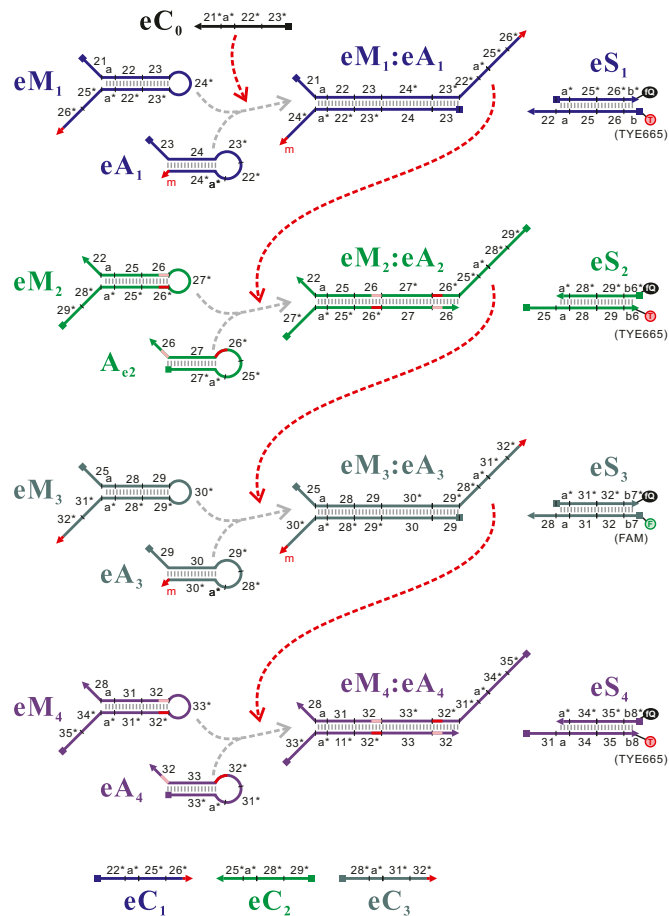

**Fig. S5.** Secondary structure and domain organization of the components of the four-layer CHA cascade compatible with enzymatic synthesis. Intermediate catalysts ( $eC_1$ ,  $eC_2$ , and  $eC_3$ ) and fluorescent reporters ( $eS_1$ ,  $eS_2$ , and  $eS_3$ ) used to test individual CHA reactions are also shown. Red and pink segments on DNA molecules show the position of CAG and CTG trinucleotides due to the introduction of the PvuII sites, respectively. Gray dashed arrows connect reactants and products, whereas red dashed arrows connect the catalysts and the catalyzed reactions. Hairpins of the same layer are shown in the same color.

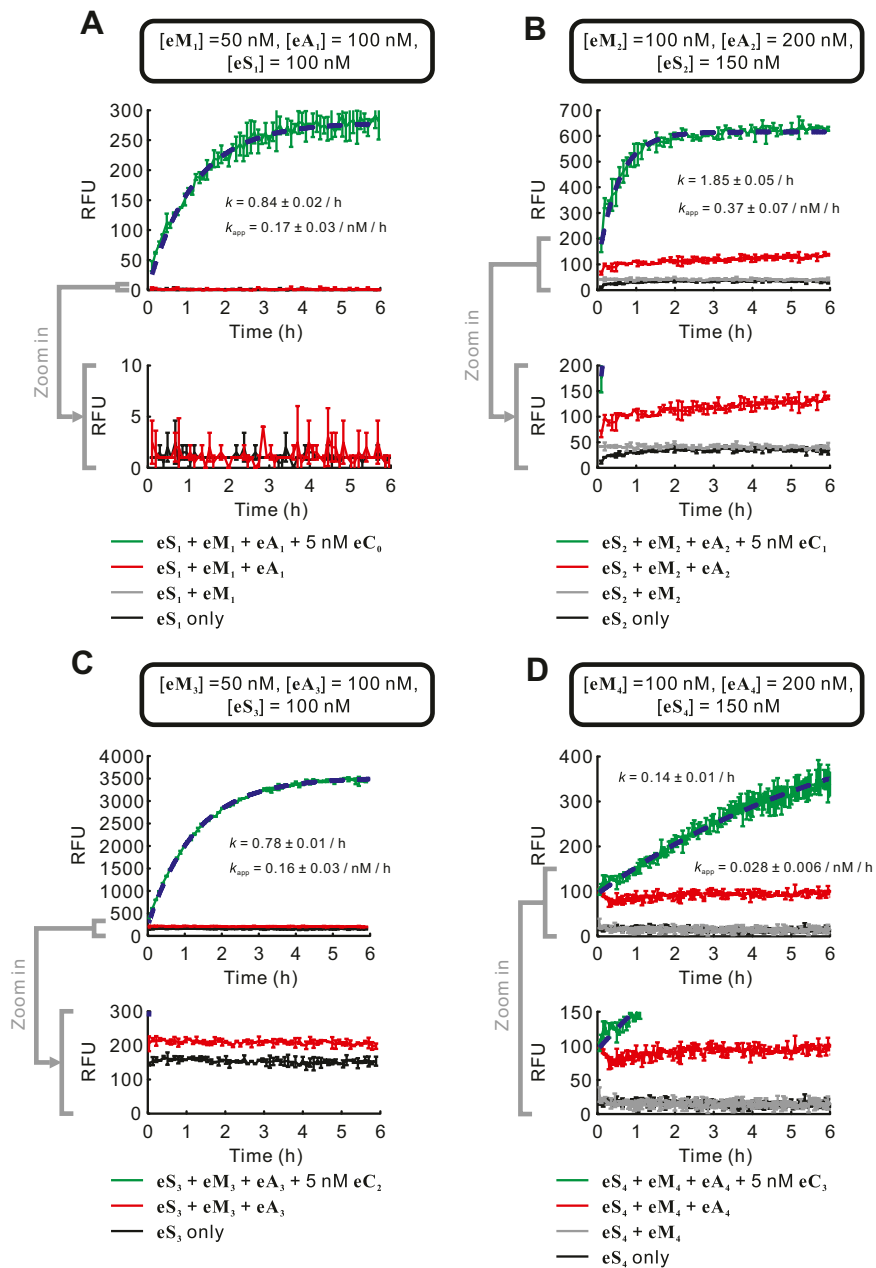

**Fig. S6.** Kinetic characterization of single-layer CHA reactions (A)  $eM_1 + eA_1 \rightarrow eM_1:eA_1$ , catalyzed by  $eC_0$ . (B)  $eM_2 + eA_2 \rightarrow eM_2:eA_2$ , catalyzed by  $eC_1$ . (C)  $eM_3 + eA_3 \rightarrow eM_3:eA_3$ , catalyzed by  $eC_2$ . (D)  $eM_4 + eA_4 \rightarrow eM_4:eA_4$ , catalyzed by  $eC_3$ . Experiments shown in A and C were carried out with enzymatically synthesized hairpins; those shown in B and D were carried out with chemically synthesized, D-pure hairpins.

$[eM_3] = 50 \text{ nM}$ ,  $[eA_3] = 100 \text{ nM}$ ,  
 $[eM_4] = 200 \text{ nM}$ ,  $[eA_4] = 300 \text{ nM}$ ,  
 $[eS_4] = 300 \text{ nM}$

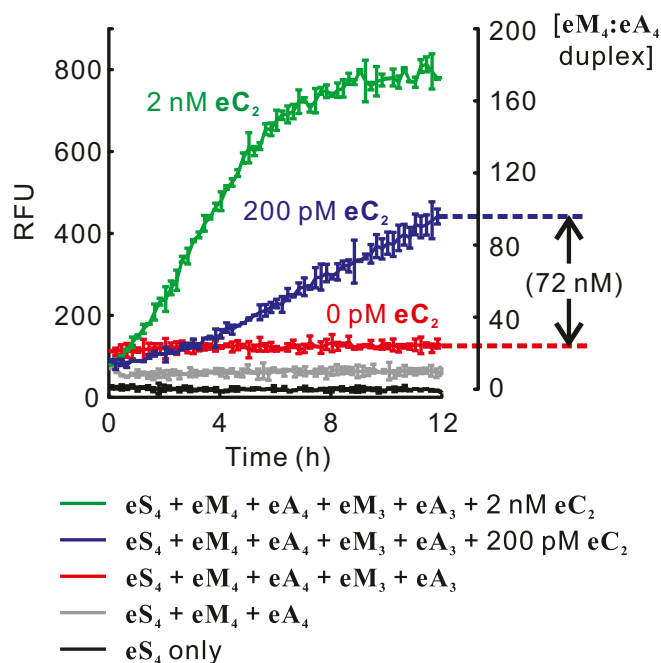

Fig. S7. Performance of the two-layer linear cascade consisting of enzymatically synthesized  $eM_3$  and  $eA_3$  and chemically synthesized DN-pure  $eM_4$  and  $eA_4$ .

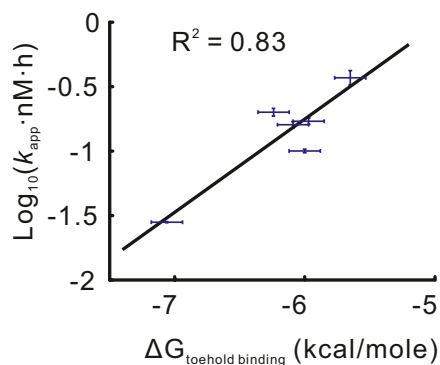

Fig. S8. Negative correlation between CHA speed and toehold strength. A more negative  $\Delta G$  indicates a stronger toehold binding. The  $k_{app}$  values are taken from the results shown in Figs. S2 and S6. The error of the  $k_{app}$  measurement is dominated by error of catalyst concentration. We estimated that this should be within 15% and therefore applied a 15% relative error in the plotting. The error of  $\Delta G$  estimation has been shown to be within 0.14 kcal/mol (1), and we therefore applied this estimation in the plot.

1. SantaLucia J, Jr. (1998) A unified view of polymer, dumbbell, and oligonucleotide DNA nearest-neighbor thermodynamics. *Proc Natl Acad Sci USA* 95(4):1460-1465.

**Table S1. Summary of domain sequences**

| Domain ID | Sequence        |
|-----------|-----------------|
| a         | GAG             |
| b         | TCAG            |
| m         | CAG             |
| b6        | GTG             |
| b7        | GTTG            |
| b8        | GAAG            |
| 2         | GTTTCACC        |
| 3         | CACATACG        |
| 4         | GATCACCCCAAGTAG |
| 5         | GCACTTTC        |
| 6         | GCTACTAC        |
| 7         | GTGTTTTAGCGAGCG |
| 8         | CATCTTCG        |
| 9         | GCCATTTT        |
| 10        | CGTGGAGGATATAGC |
| 11        | CACATCAG        |
| 12        | CTTTAGCC        |
| 21        | GTCACTCT        |
| 22        | TATCCCTG        |
| 23        | GACGTAAG        |
| 24        | CCATTAGAGAGAGAG |
| 25        | CGGTAGAA        |
| 26        | CTGAAGTG        |
| 27        | CAAGGGTGATAAAC  |
| 28        | AAAGTGCG        |
| 29        | AGTAGAGC        |
| 30        | CGATAAGGAAAGGTC |
| 31        | GGACGAAT        |
| 32        | CTGGAAAG        |
| 33        | GTTGAAATTGAGCCG |
| 34        | GGAAGGTA        |
| 35        | GAATGAGC        |

**Table S2. Sequences of oligonucleotides used in this work**

| Strand                                               | Sequence                                                                                  |
|------------------------------------------------------|-------------------------------------------------------------------------------------------|
| <b>Layer 1</b>                                       |                                                                                           |
| <b>C<sub>0</sub></b>                                 | GGTGAAC CTC GAAAGTGC GTAGTAGC                                                             |
| <b>M<sub>1</sub></b>                                 | GAAATGGC CGAAGATG CTC GAAAGTGC GTAGTAGC CGCTCGCTAAACAC GCTACTAC GCACCTTC GAG<br>GTTTCACC  |
| <b>A<sub>1</sub></b>                                 | CGCTCGCTAAACAC CTC GAAAGTGC GTAGTAGC GTGTTTTAGCGAGCG GCTACTAC                             |
| <b>S<sub>1</sub>-F</b>                               | GCACCTTC GAG CATCTTCG GCCATTC CCAT/36-FAM/                                                |
| <b>S<sub>2</sub>-Q</b>                               | /5IAbFQ/ATGG GAAATGGC CGAAGATG CTC                                                        |
| <b>B purification</b>                                |                                                                                           |
| <b>S<sub>2</sub>mimic-L.Bio</b>                      | GCACCTTC GAG CATCTTCG GCCATTC TTTTT/3Bio/                                                 |
| <b>S<sub>2</sub>mimic-S</b>                          | GAAATGGC CGAAGATG CTC                                                                     |
| <b>Layer 2</b>                                       |                                                                                           |
| <b>C<sub>1</sub></b>                                 | GAAATGGC CGAAGATG CTC GAAAGTGC                                                            |
| <b>M<sub>2</sub></b>                                 | GCACCTTC GAG CATCTTCG GCCATTC GCTATATCCTCCAG GAAATGGC CGAAGATG CTC CTGATGTG<br>GGCTAAAG   |
| <b>A<sub>2</sub></b>                                 | GCCATTC CGTGGAGGATATAGC GAAATGGC CGAAGATG CTC GCTATATCCTCCAG                              |
| <b>S<sub>3</sub>-F</b>                               | /5TYE665/TCAG CTTTAGCC CACATCAG GAG CATCTTCG                                              |
| <b>S<sub>3</sub>-Q</b>                               | CTC CTGATGTG GGCTAAAG CTGA/3IAbRQSp/                                                      |
| <b>Layer 1 (compatible with enzymatic synthesis)</b> |                                                                                           |
| <b>eC<sub>0</sub></b>                                | CTTACGTC CAGGGATA CTC AGAGTGAC                                                            |
| <b>eM<sub>1</sub></b>                                | GTCACCT GAG TATCCCTG GACGTAAG CTCTCTCTAATGG CTTACGTC CAGGGATA CTC TTCTACCG<br>CACTTCAG    |
| <b>eA<sub>1</sub></b>                                | GACGTAAG CCATTAGAGAGAGAG CTTACGTC CAGGGATA CTC CTCTCTCTAATGG CAG                          |
| <b>eS<sub>1</sub>-F</b>                              | /5TYE665/TCAG CTGAAGTG CGGTAGAA GAG TATCCCTG                                              |
| <b>eS<sub>1</sub>-Q</b>                              | CTC TTCTACCG CACTTCAG CTGA /3IAbRQSp/                                                     |
| <b>Layer 2 (compatible with enzymatic synthesis)</b> |                                                                                           |
| <b>eC<sub>1</sub></b>                                | CAGGGATA CTC TTCTACCG CACTTCAG                                                            |
| <b>eM<sub>2</sub></b>                                | GCTCTACT CGCACTTT CTC TTCTACCG CACTTCAG GTTTATCACCCCTTG CTGAAGTG CGGTAGAA GAG<br>TATCCCTG |
| <b>eA<sub>2</sub></b>                                | GTTTATCACCCCTTG CTC TTCTACCG CACTTCAG CAAGGGTGATAAAC CTGAAGTG                             |
| <b>eS<sub>2</sub>-F</b>                              | CGGTAGAA GAG AAAGTGCG AGTAGAGC TCAG /3TYE665/                                             |
| <b>eS<sub>2</sub>-Q</b>                              | /5IAbRQ/CTGA GCTCTACT CGCACTTT CTC                                                        |
| <b>Layer 3 (compatible with enzymatic synthesis)</b> |                                                                                           |
| <b>eC<sub>2</sub></b>                                | GCTCTACT CGCACTTT CTC TTCTACCG                                                            |
| <b>eM<sub>3</sub></b>                                | CGGTAGAA GAG AAAGTGCG AGTAGAGC GACCTTTCCTTATCG GCTCTACT CGCACTTT CTC ATTCGTCC<br>CTTTCCAG |
| <b>eA<sub>3</sub></b>                                | AGTAGAGC CGATAAGGAAAGGTC GCTCTACT CGCACTTT CTC GACCTTTCCTTATCG CAG                        |
| <b>eS<sub>3</sub>-F</b>                              | /56FAM/GTTG CTGAAAAG GGACGAAT GAG AAAGTGCG                                                |
| <b>eS<sub>3</sub>-Q</b>                              | CTC ATTCGTCC CTTTCCAG CAAC/3IABkFQ/                                                       |
| <b>Layer 4 (compatible with enzymatic synthesis)</b> |                                                                                           |
| <b>eC<sub>3</sub></b>                                | CGCACTTT CTC ATTCGTCC CTTTCCAG                                                            |
| <b>eM<sub>4</sub></b>                                | GCTCATTC TACCTTCC CTC ATTCGTCC CTTTCCAG CGGCTCAATTTCAAC CTGAAAAG GGACGAAT GAG<br>AAAGTGCG |
| <b>eA<sub>4</sub></b>                                | CGGCTCAATTTCAAC CTC ATTCGTCC CTTTCCAG GTTGAAATTGAGCCG CTGAAAAG                            |
| <b>eS<sub>4</sub>-F</b>                              | GGACGAAT GAG GGAAGGTA GAATGAGC GAAG /3TYE665/                                             |
| <b>eS<sub>4</sub>-Q</b>                              | /5IAbRQ/ CTTC GCTCATTC TACCTTCC CTC                                                       |
| <b>Common primers for SLIC</b>                       |                                                                                           |
| <b>Insert-F</b>                                      | CAGTCTTAAGCTCGGGC                                                                         |
| <b>Insert-R</b>                                      | CGACTCACTATAGGGGATAT                                                                      |
| <b>Vector-F</b>                                      | ATATCCCCTATAGTGAGTCGTATTACATGGT                                                           |
| <b>Vector-R</b>                                      | GGGGCCCCGAGCTTAAGACT                                                                      |
| <b>To build eM<sub>1</sub></b>                       |                                                                                           |
| <b>eM1.s1</b>                                        | CAGTCTTAAGCTCGGGCCCC GAGTC AAGC GTCACTCT                                                  |
| <b>eM1.s2</b>                                        | GAGTC AAGC GTCACTCT GAG TATCCCTG GACGTAAG CTCTCTCTAATGG                                   |
| <b>eM1.as2</b>                                       | TCAGCTGAAGTGCGGTAGAAAGAGTATCCCTGGACGTAAGCCATTAGAGAGAGAG                                   |
| <b>eM1.as1</b>                                       | CGACTCACTATAGGGGATATCAGCTGAAGTGCGGTAGAA                                                   |
| <b>To build eA<sub>1</sub></b>                       |                                                                                           |
| <b>eA1.s1</b>                                        | CAGTCTTAAGCTCGGGCCCC GAGTC AAGC GACGTAAG                                                  |
| <b>eA1.s2</b>                                        | GAGTC AAGC GACGTAAG CCATTAGAGAGAGAG CTTACGTC CAGGGATA CTC                                 |
| <b>eA1.as1</b>                                       | CGACTCACTATAGGGGATATCAGCTGCCATTAGAGAGAGAGGAGTATCCCTGGACGTAAG                              |
